# Supplementary material for: Significance of sphingosine kinase 1 expression in feline mammary tumors
Source: PubMed Central journal article supplement (PMC6525354; doi:10.1186/s12917-019-1883-z), 2019-05-17

| Score | Staining pattern                 |
|-------|----------------------------------|
| 0     | No observable or weak staining   |
| 1+    | Weak staining in malignant cells |
| 2+    | Moderate staining                |
| 3+    | strong staining                  |

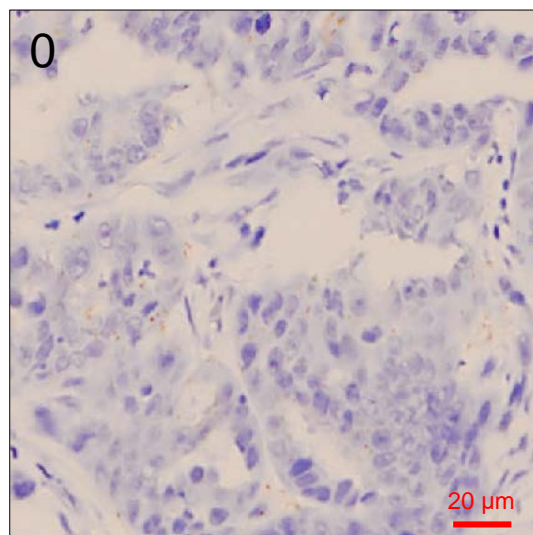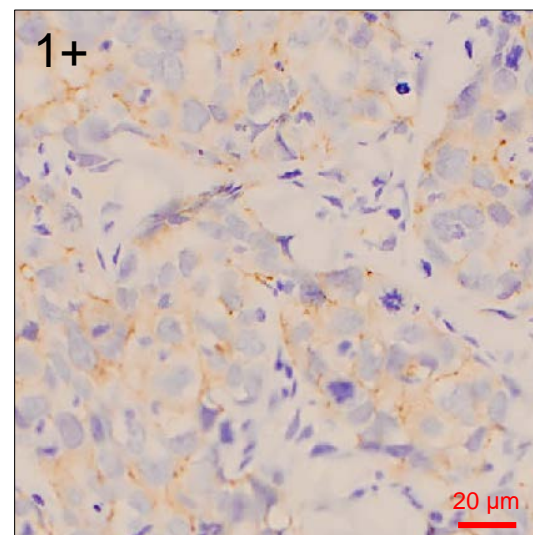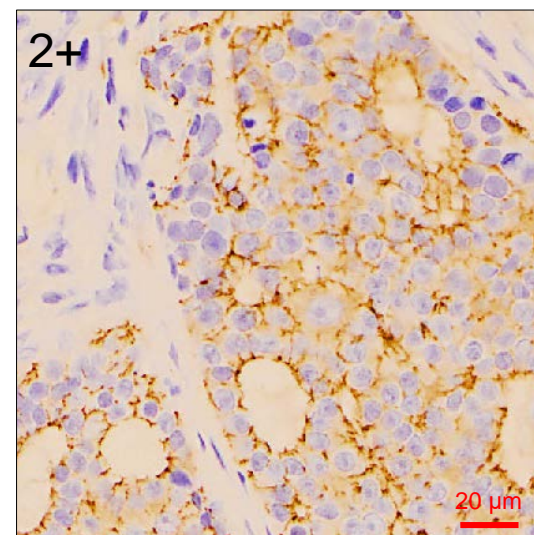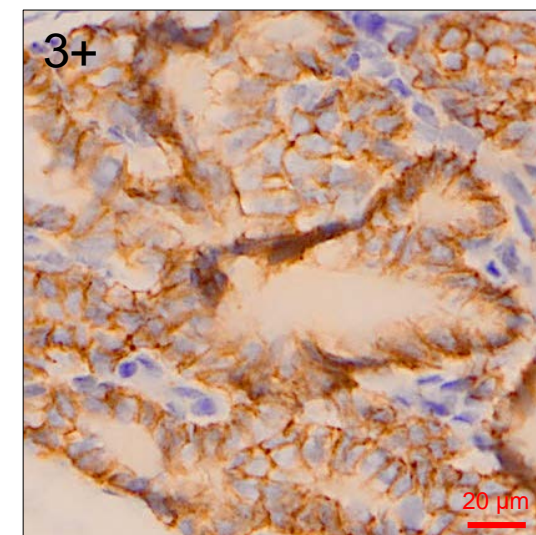

Supplement: 12917_2019_1883_MOESM2_ESM.pdf [file 12917_2019_1883_MOESM2_ESM.pdf]
