# Supplementary material for: Significance of sphingosine kinase 1 expression in feline mammary tumors
Source: PubMed Central journal article supplement (PMC6525354; doi:10.1186/s12917-019-1883-z), 2019-05-17

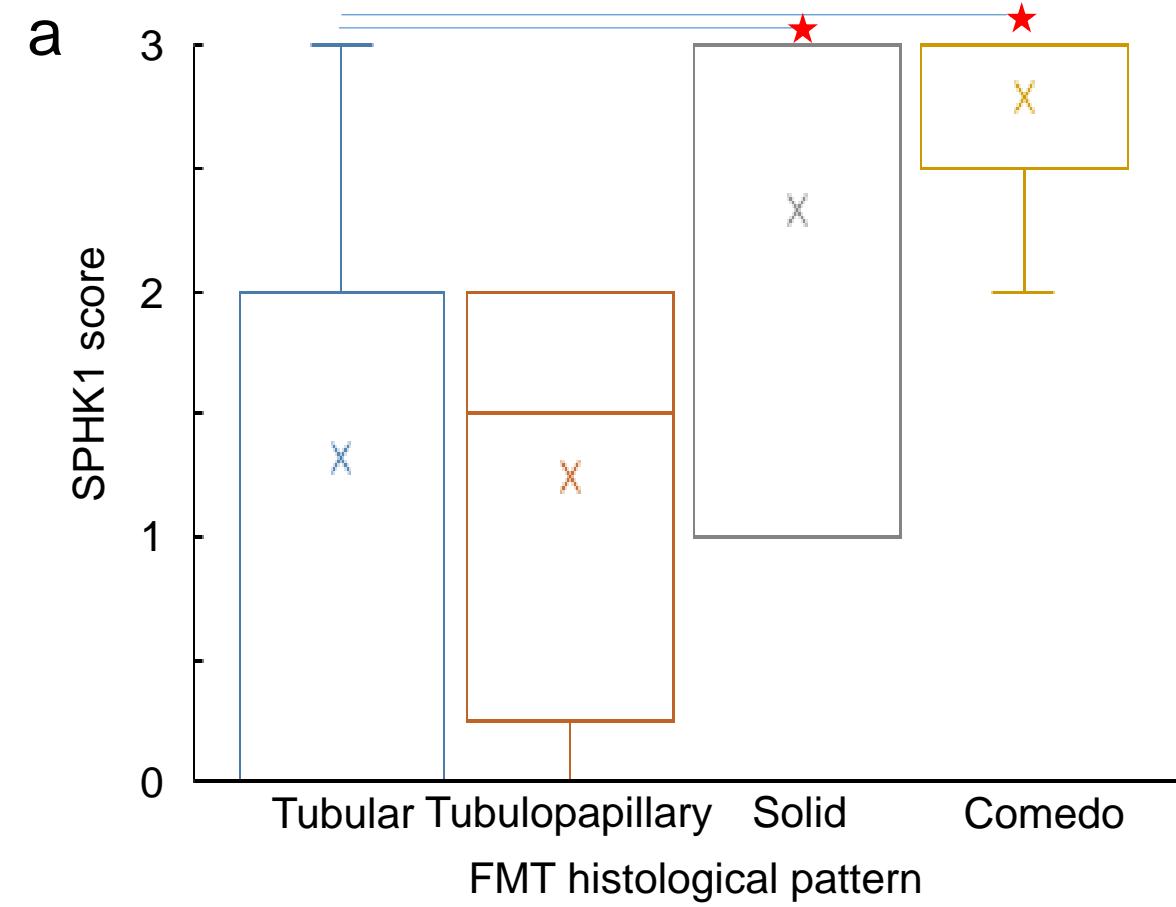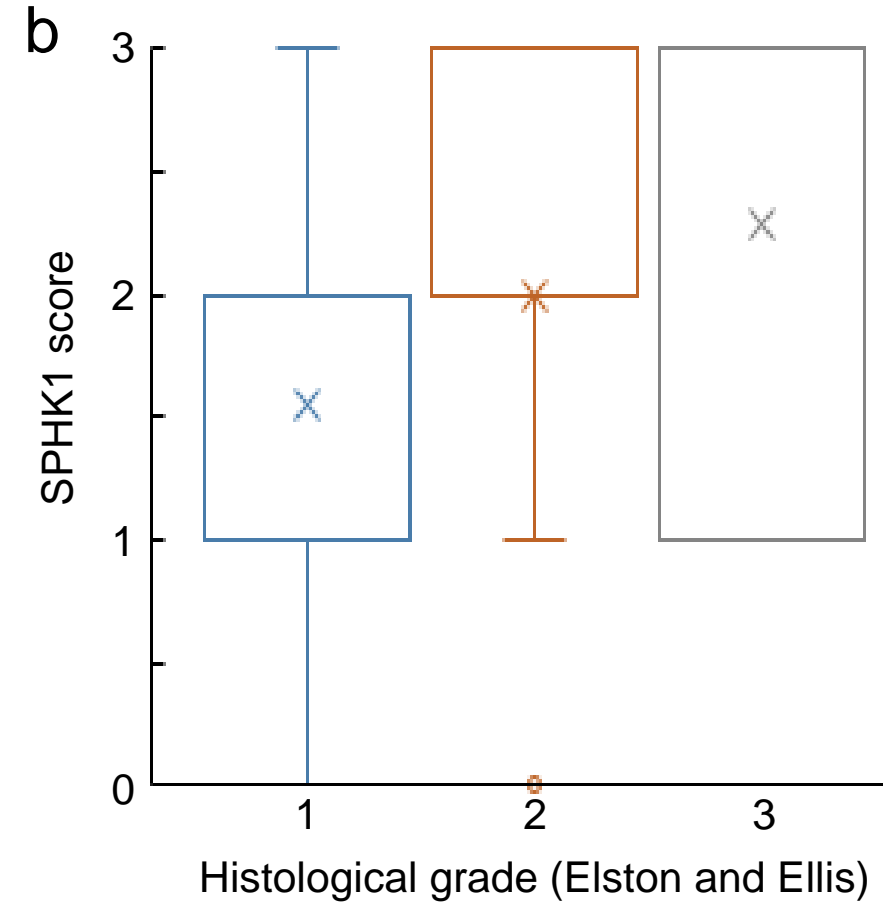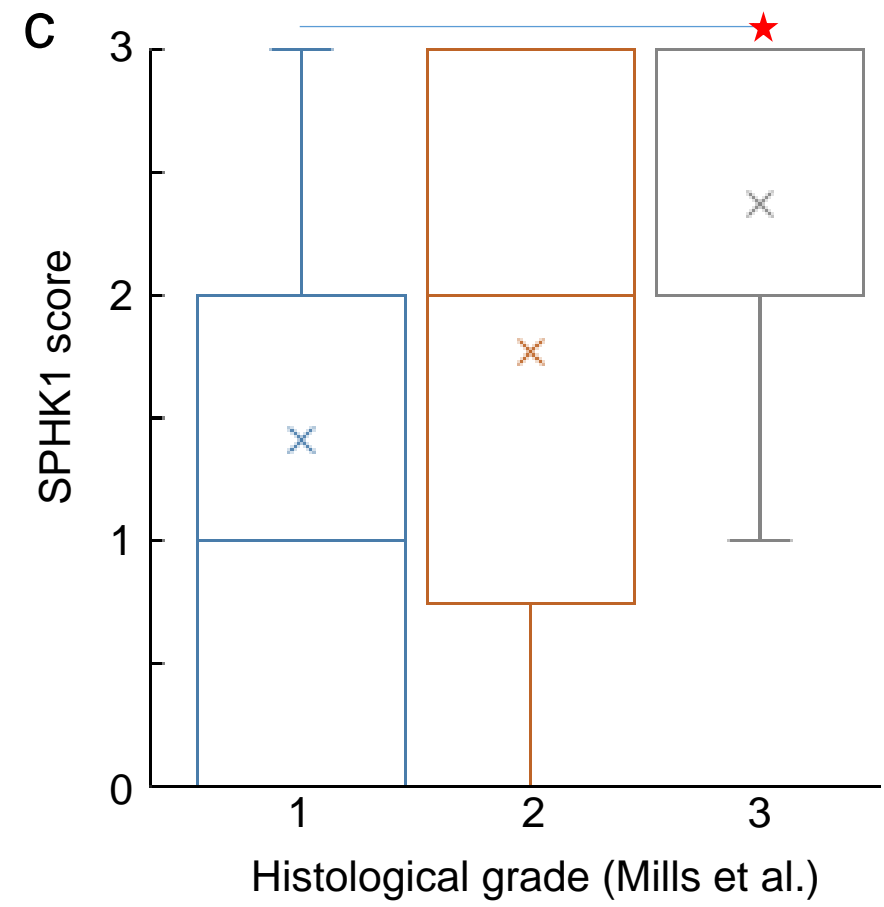

Supplement: 12917_2019_1883_MOESM3_ESM.pdf [file 12917_2019_1883_MOESM3_ESM.pdf]
